# Supplementary material for: Few-layered Ti3C2Tx MXenes coupled with Fe2O3 nanorod arrays grown on carbon cloth as anodes for flexible asymmetric supercapacitors
Source: Royal Society of Chemistry journal article supplement (doi:10.1039/c9ta08144e), 2019-01-01
Supplement: c9ta08144e1.pdf [file c9ta08144e1.pdf]

## Supporting Information

### **Few-layered $\text{Ti}_3\text{C}_2\text{T}_x$ MXene coupled with $\text{Fe}_2\text{O}_3$ nanorod arrays grown on carbon cloth as anodes for flexible asymmetric supercapacitors**

Fei Li<sup>1,†</sup>, Yi-Lin Liu<sup>1,†</sup>, Gui-Gen Wang<sup>\*,†</sup>, Hua-Yu Zhang<sup>†</sup>, Bin Zhang<sup>†</sup>,

Gui-Zhong Li<sup>†</sup>, Zhi-Peng Wu<sup>†</sup>, Le-Yang Dang<sup>†</sup>, Jie-Cai Han<sup>†,‡</sup>

<sup>†</sup>*Shenzhen Key Laboratory for Advanced Materials, Harbin Institute of Technology, Shenzhen, Shenzhen 518055, China*

<sup>‡</sup>*Center for Composite Materials, Harbin Institute of Technology, Harbin 150080, China*

Corresponding author (G.G. Wang). Tel: +86-755-26629471, fax: +86-755-26033504.

E-mail: wangguigen@hit.edu.cn

Table S1. The mass of Mxene coated on Fe<sub>2</sub>O<sub>3</sub>/CC varied with dipping times (the Fe<sub>2</sub>O<sub>3</sub> loading mass on CC was about 1.35 mg cm<sup>-2</sup>)

| Mxene@Fe <sub>2</sub> O <sub>3</sub> /CC<br>composite | 0.5-Mxene@<br>Fe <sub>2</sub> O <sub>3</sub> /CC | 1-Mxene@<br>Fe <sub>2</sub> O <sub>3</sub> /CC | 1.5-Mxene@<br>Fe <sub>2</sub> O <sub>3</sub> /CC | 2-Mxene@<br>Fe <sub>2</sub> O <sub>3</sub> /CC |
|-------------------------------------------------------|--------------------------------------------------|------------------------------------------------|--------------------------------------------------|------------------------------------------------|
| Dipping times                                         | 4                                                | 7                                              | 9                                                | 12                                             |
| Loading mass of<br>Mxene (mg cm <sup>-2</sup> )       | 0.53                                             | 1.04                                           | 1.48                                             | 2.02                                           |

As to the 1.0-Mxene@Fe<sub>2</sub>O<sub>3</sub>/CC, 1.5-Mxene@Fe<sub>2</sub>O<sub>3</sub>/CC, and 2.0-Mxene@Fe<sub>2</sub>O<sub>3</sub>/CC electrode, the Mxene sheets almost coated the Fe<sub>2</sub>O<sub>3</sub>/CC completely. With the increase content of Mxene in the composites, the increasing value of specific capacitance is almost equal. The specific capacitance of 1.0-Mxene@Fe<sub>2</sub>O<sub>3</sub>/CC (1), 1.5-Mxene@Fe<sub>2</sub>O<sub>3</sub>/CC (2), and 2.0-Mxene@Fe<sub>2</sub>O<sub>3</sub>/CC (3) is 446, 579, and 725 mF cm<sup>-2</sup>, respectively. The area capacitance of (2)-(1) is approximately equal to that of (3)-(2) which is about 140 mF cm<sup>-2</sup>, suggesting that the increased capacitance was attributed by added Mxene when the Fe<sub>2</sub>O<sub>3</sub>/CC was coated completely by the Mxene sheets. In addition, as shown from the SEM images in Fig. S7, it can be observed that the Fe<sub>2</sub>O<sub>3</sub>/CC was coated gradually with the increase of Mxene content. Among the 2.0-Mxene@Fe<sub>2</sub>O<sub>3</sub>/CC flexible electrode, the Fe<sub>2</sub>O<sub>3</sub>/CC was completely wrapped by the Mxene sheet compared with the other three electrodes. Therefore, based on above these results, the 2.0-Mxene@Fe<sub>2</sub>O<sub>3</sub>/CC is considered as the desired loading mass.

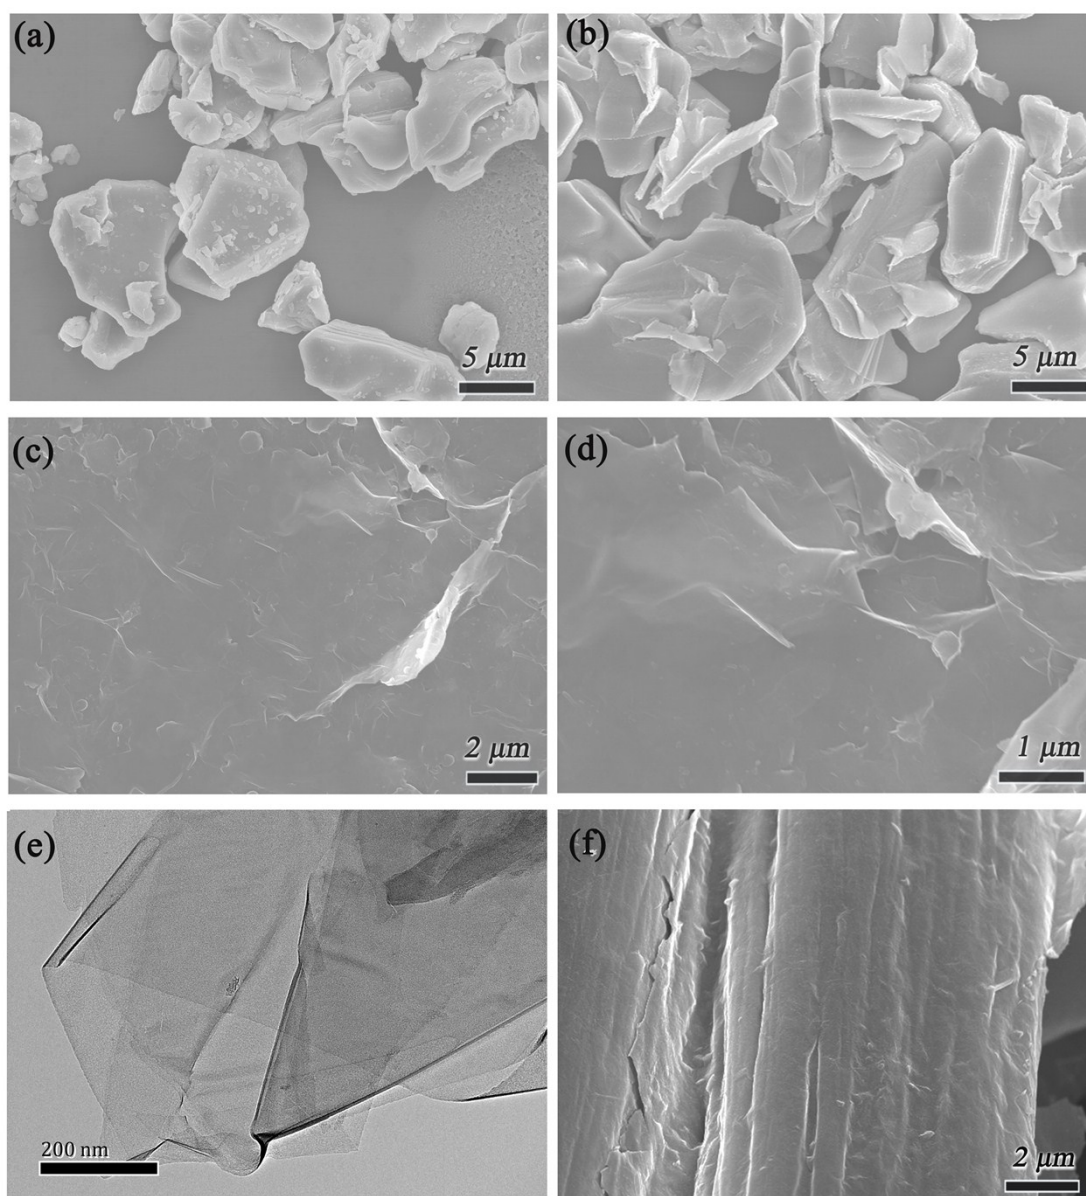

**Fig. S1** SEM images of (a) the pristine Max(Ti<sub>3</sub>AlC<sub>2</sub>) and (b) the non-delaminated Ti<sub>2</sub>CT<sub>x</sub> MXene which is the sediment centrifuged at 1000 rpm for 5 min. (c,d) SEM images of MXene sheets with different magnifications, (e) TEM image of MXene sheets, (f) Surface SEM image of MXene/CC.

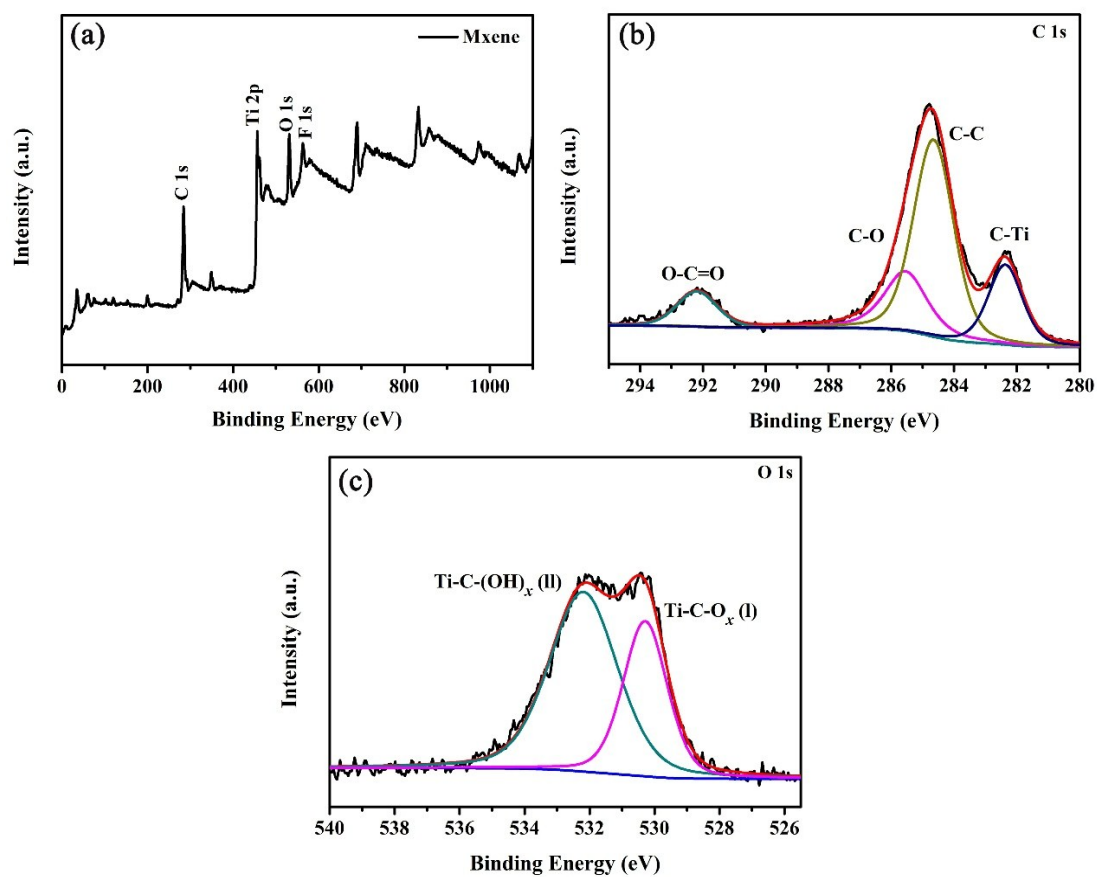

**Fig. S2** (a) XPS survey spectrum of the delaminated  $\text{Ti}_2\text{CT}_x$  Mxene.  
(b-c) High-resolution XPS spectra of C 1s and O 1s.

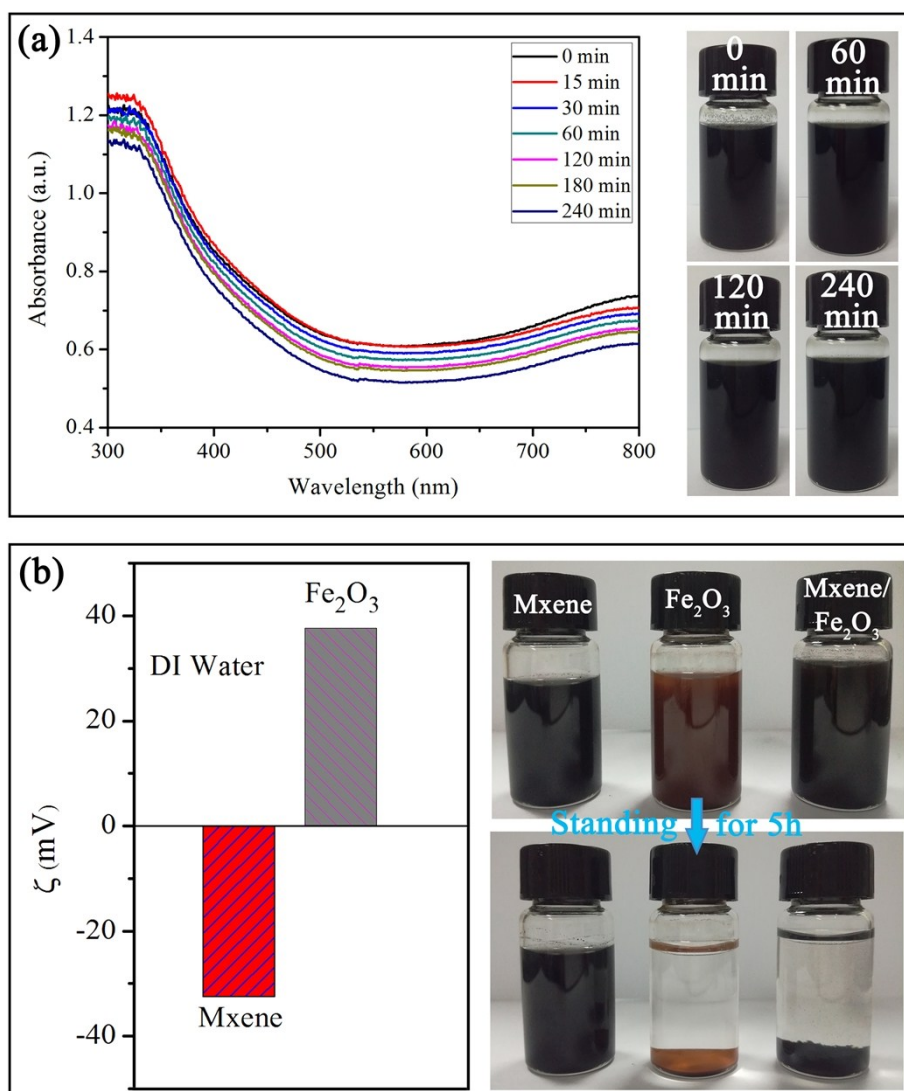

**Fig. S3** (a) The UV-Vis spectra and digital photographs of Mxene solution after different standing time. The Mxene solution (1mg/mL) was standing for different time, then 0.5 mL of Mxene solution was taken out and diluted for 20 times. (b) Zeta potentials of Mxene and  $\text{Fe}_2\text{O}_3$  in DI water, and the digital photographs of Mxene,  $\text{Fe}_2\text{O}_3$ , and Mxene/  $\text{Fe}_2\text{O}_3$  solution for standing 5 hours.

The Mxene sheets contain many termination functional groups (-O, -OH, and -F), benefiting for metallic oxides to bond together by electrostatic interaction. The  $\zeta$  values of Mxene and  $\text{Fe}_2\text{O}_3$  in DI water are -32.5 and 37.7 mV, respectively. The opposite potentials of Mxene and  $\text{Fe}_2\text{O}_3$  can contribute to their attraction each other. In addition, the Mxene solution remains good dispersion, and the mixed solutions of  $\text{Fe}_2\text{O}_3$  and Mxene/ $\text{Fe}_2\text{O}_3$  was completely deposited at the bottom of sample bottles after standing for 5 hours. The Mxene sheet was completely subsided along with  $\text{Fe}_2\text{O}_3$ , which

indicates that the Mxene sheet and  $\text{Fe}_2\text{O}_3$  exist strong interaction to result in their depositing together. Therefore, the Mxene sheet can adhere to the  $\text{Fe}_2\text{O}_3/\text{CC}$  fibres and form coating on its surface gradually when the  $\text{Fe}_2\text{O}_3/\text{CC}$  dips into the Mxene solution. In addition, the 2D Mxene sheets tend to self-assemble layer-by-layer and the wrapped shells are formed on the surfaces of  $\text{Fe}_2\text{O}_3/\text{CC}$  fibres.

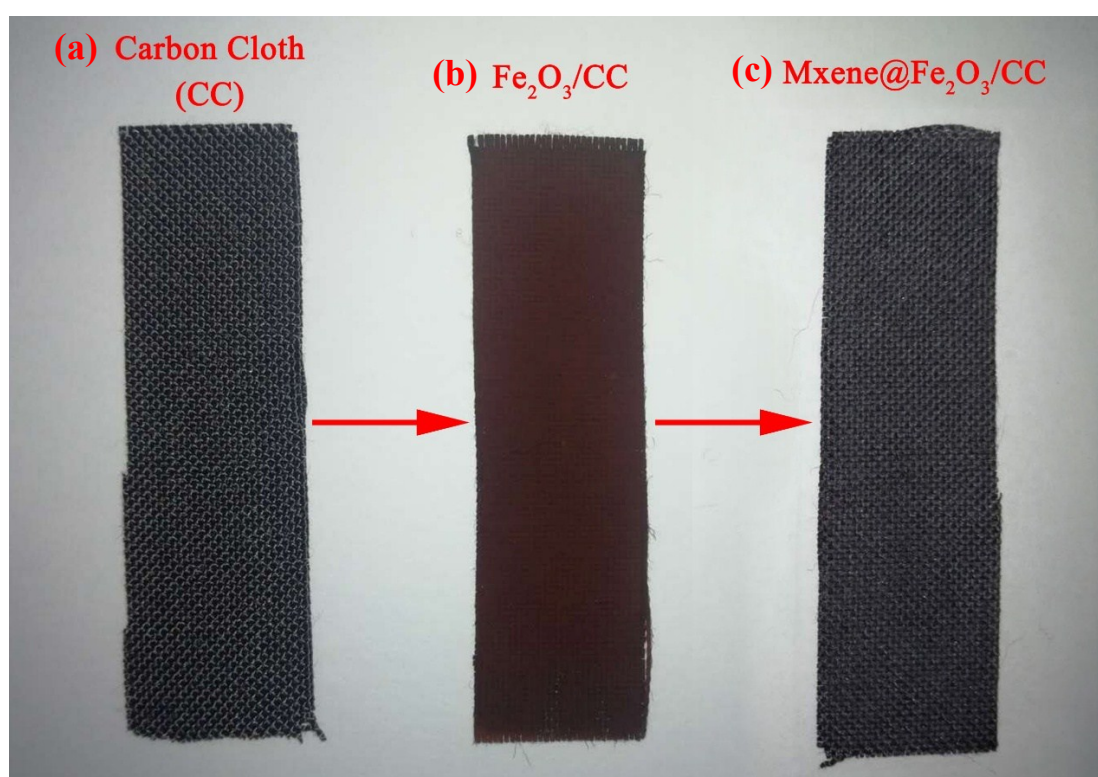

**Fig. S4** The digital photographs of pristine CC (a),  $\text{Fe}_2\text{O}_3/\text{CC}$  (b), and Mxene@ $\text{Fe}_2\text{O}_3/\text{CC}$  (c).



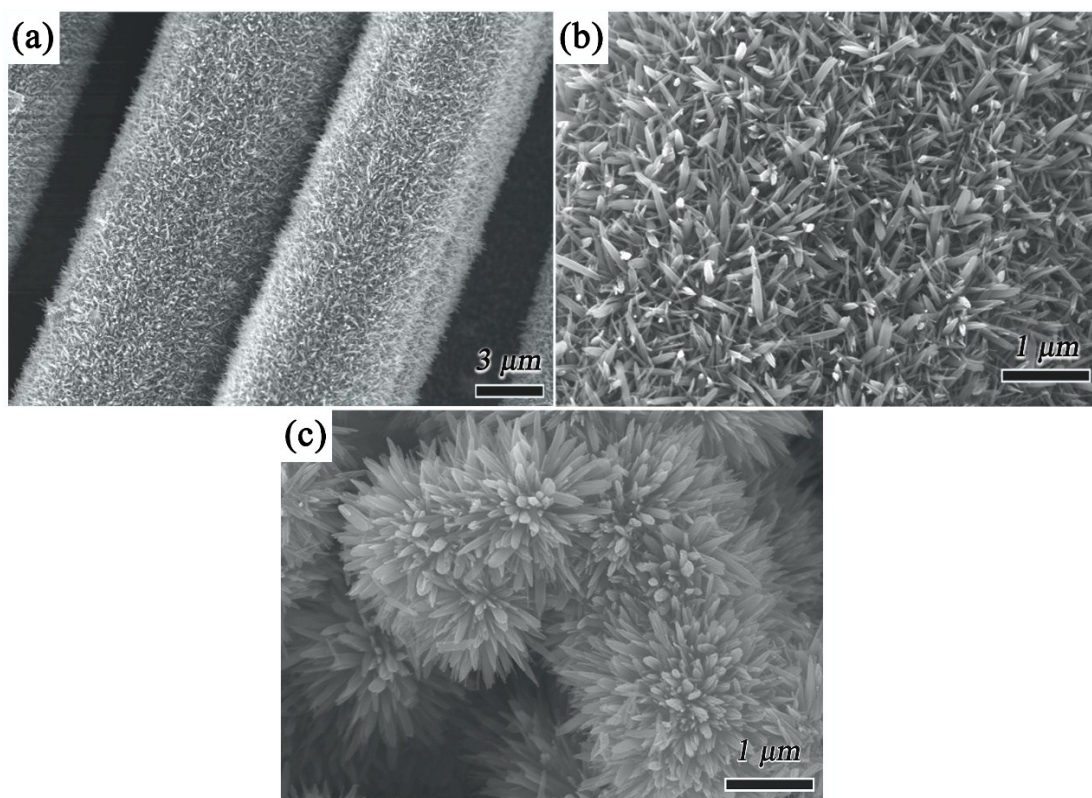

**Fig. S5** SEM images of (a) the Fe<sub>2</sub>O<sub>3</sub>/CC in which the Fe<sub>2</sub>O<sub>3</sub> was uniformly grown on each carbon fibre, (b) high-magnification image of Fe<sub>2</sub>O<sub>3</sub> which looks like the grass, and (c) the powder of Fe<sub>2</sub>O<sub>3</sub> with an urchin-like shape.

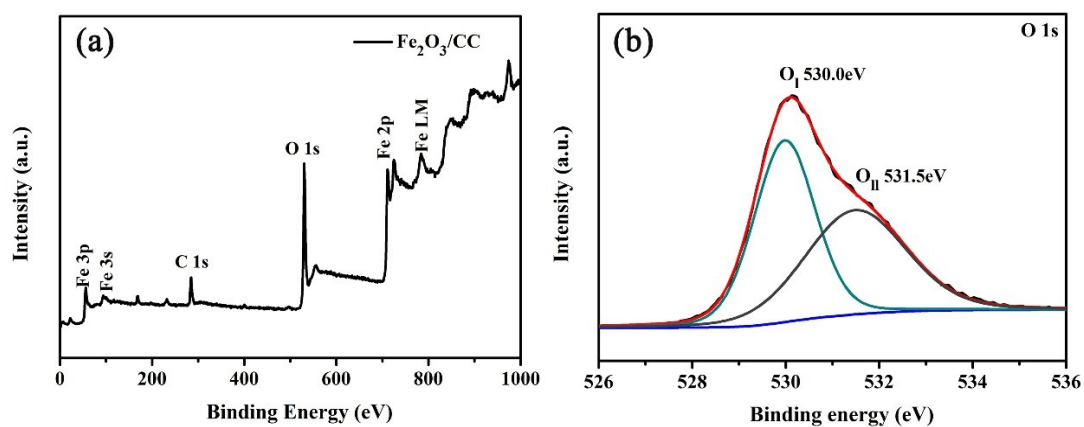

**Fig. S6** (a) XPS survey spectrum of the Fe<sub>2</sub>O<sub>3</sub>/CC. (b) High-resolution XPS spectrum of O 1s.

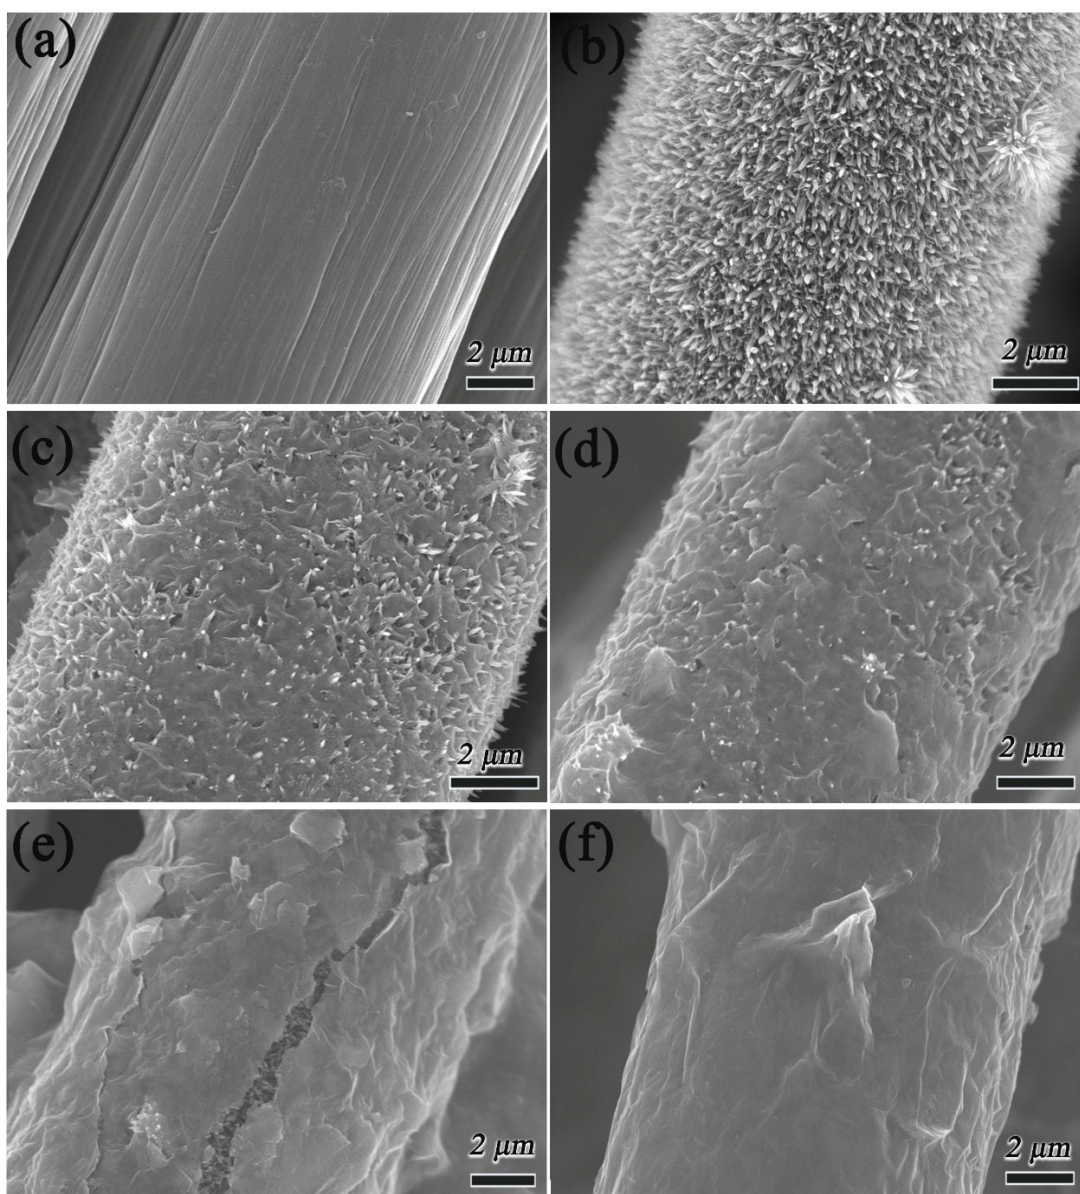

**Fig. S7** SEM images of the pristine carbon fiber (a), Fe<sub>2</sub>O<sub>3</sub>/CC (b), and Mxene@Fe<sub>2</sub>O<sub>3</sub>/CC with different loading contents of Mxene (c-f). The Fe<sub>2</sub>O<sub>3</sub>/CC was gradually coated by Mxene with the increase of dipping time in Mxene solution.



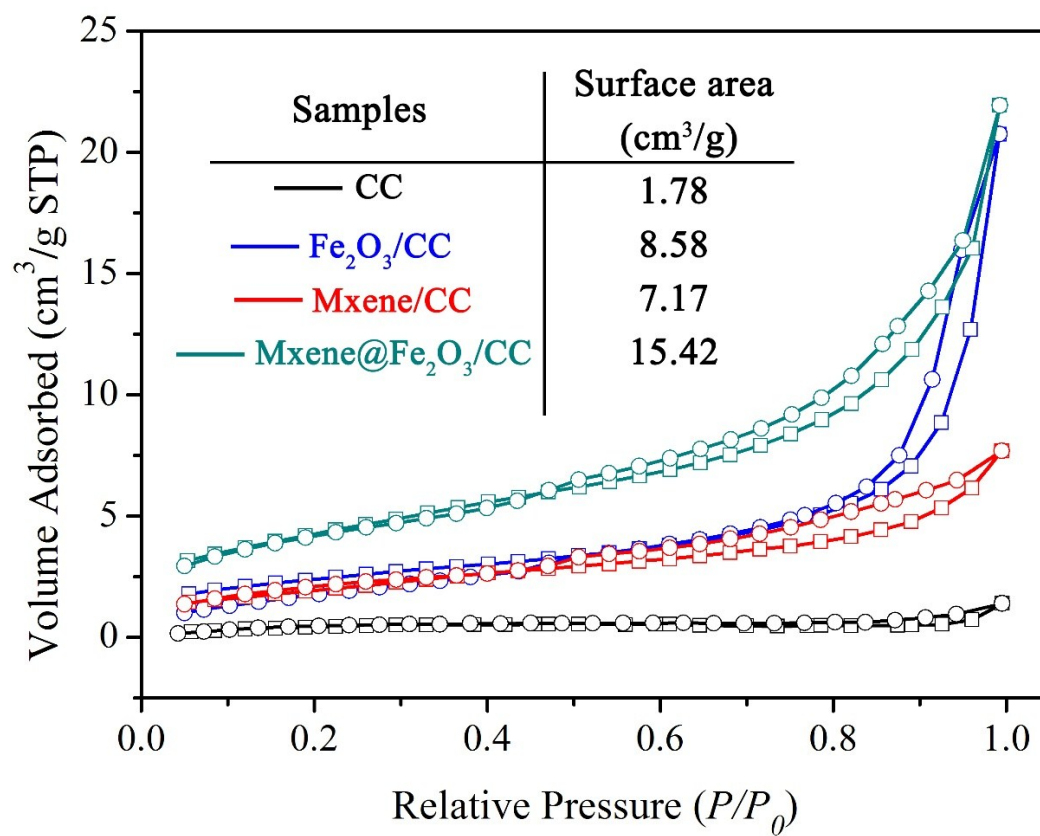

**Fig. S8** N<sub>2</sub> adsorption-desorption isotherm of the carbon cloth (CC) and Fe<sub>2</sub>O<sub>3</sub>/CC, Mxene/CC, and Mxene@Fe<sub>2</sub>O<sub>3</sub>/CC.

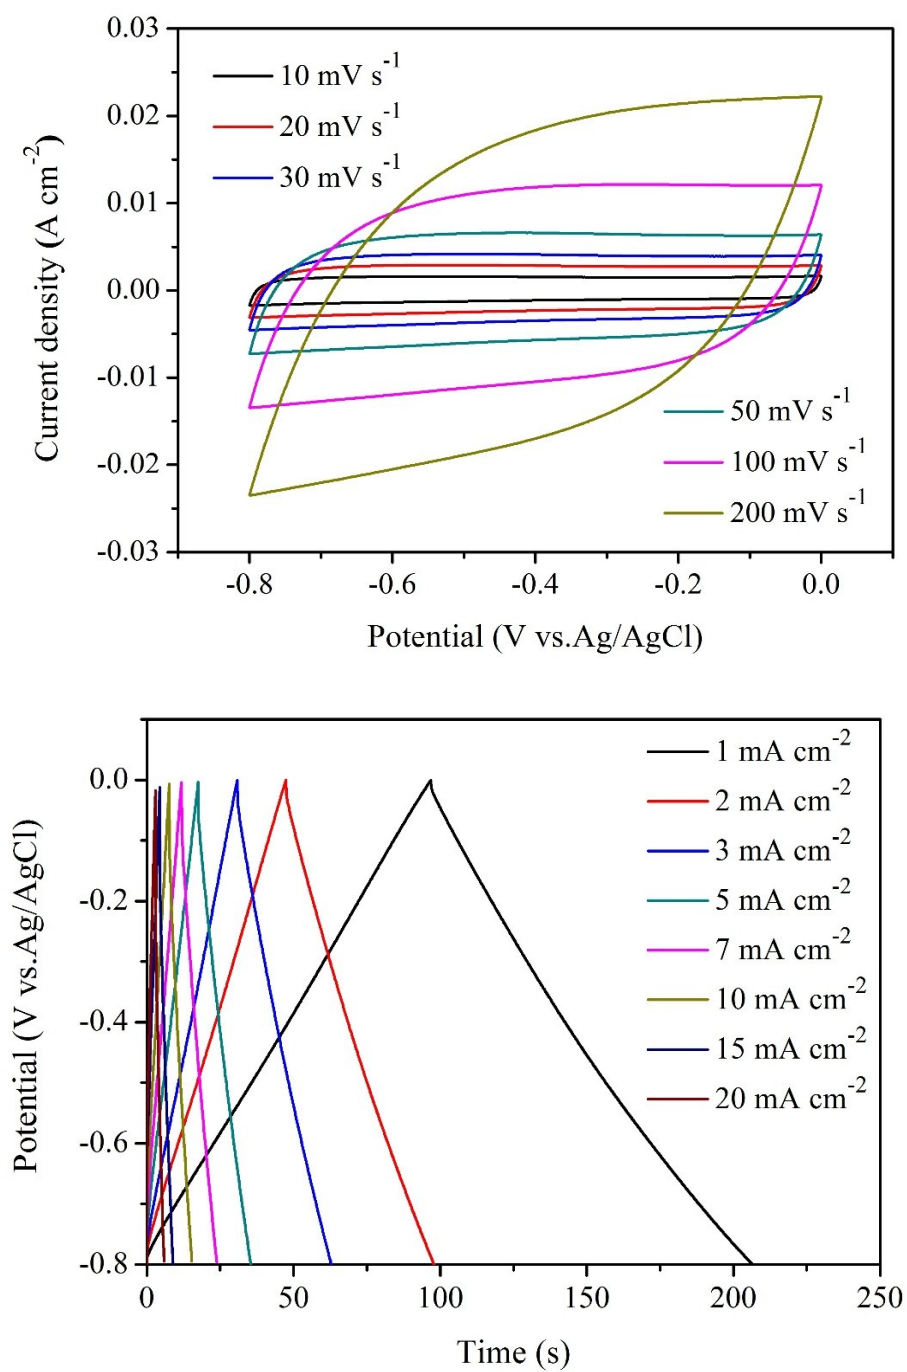

**Fig. S9** (a) CV curves of the Mxene/CC electrodes at different scan rates. (b) GCD curves of the Mxene/CC electrodes at different current densities.

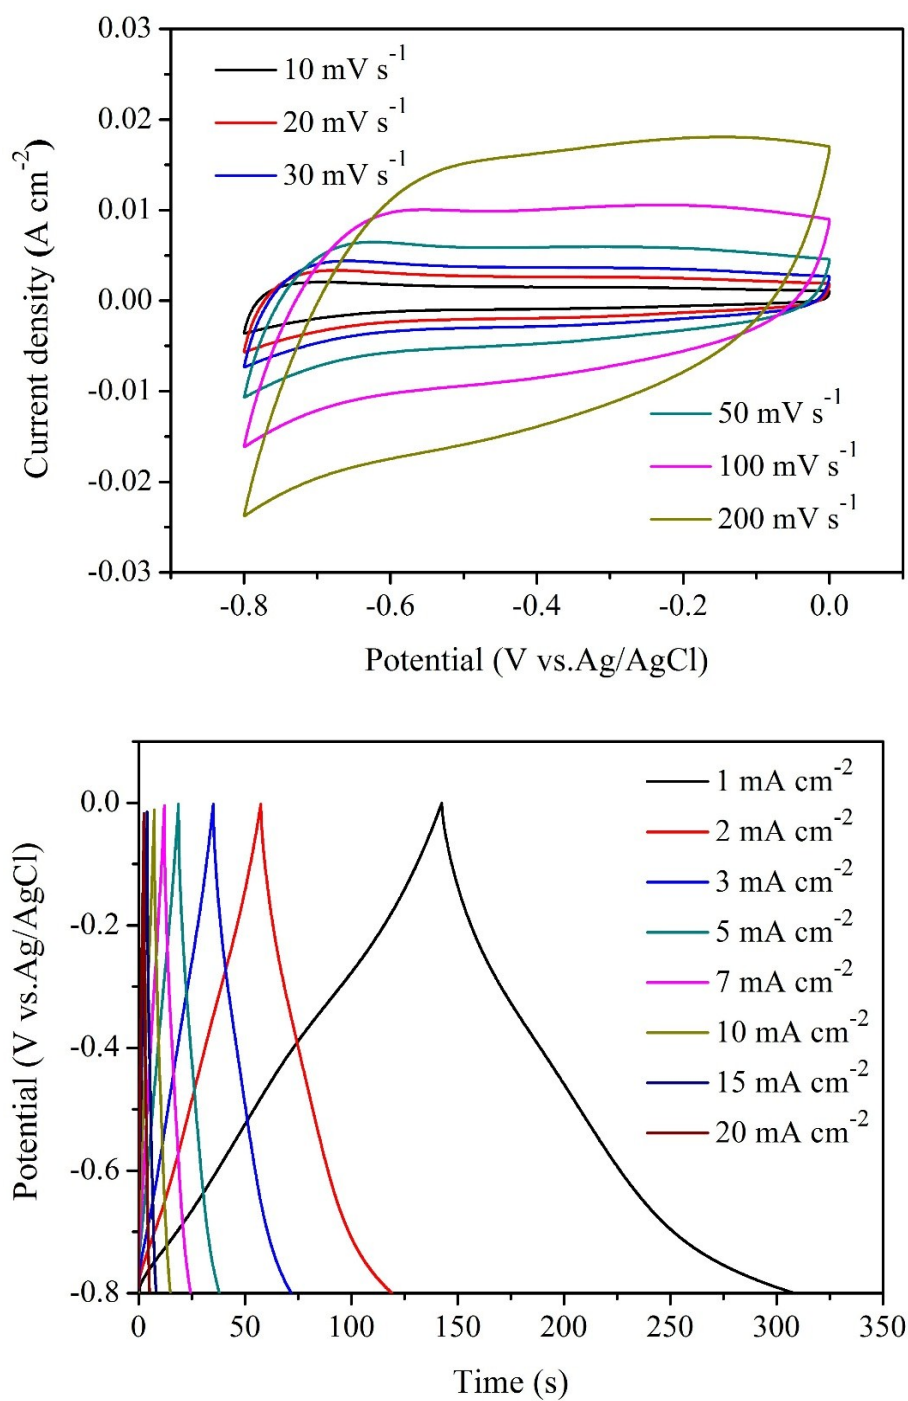

**Fig. S10** (a) CV curves of the  $\text{Fe}_2\text{O}_3/\text{CC}$  electrodes at different scan rates. (b) GCD curves of the  $\text{Fe}_2\text{O}_3/\text{CC}$  electrodes at different current densities.

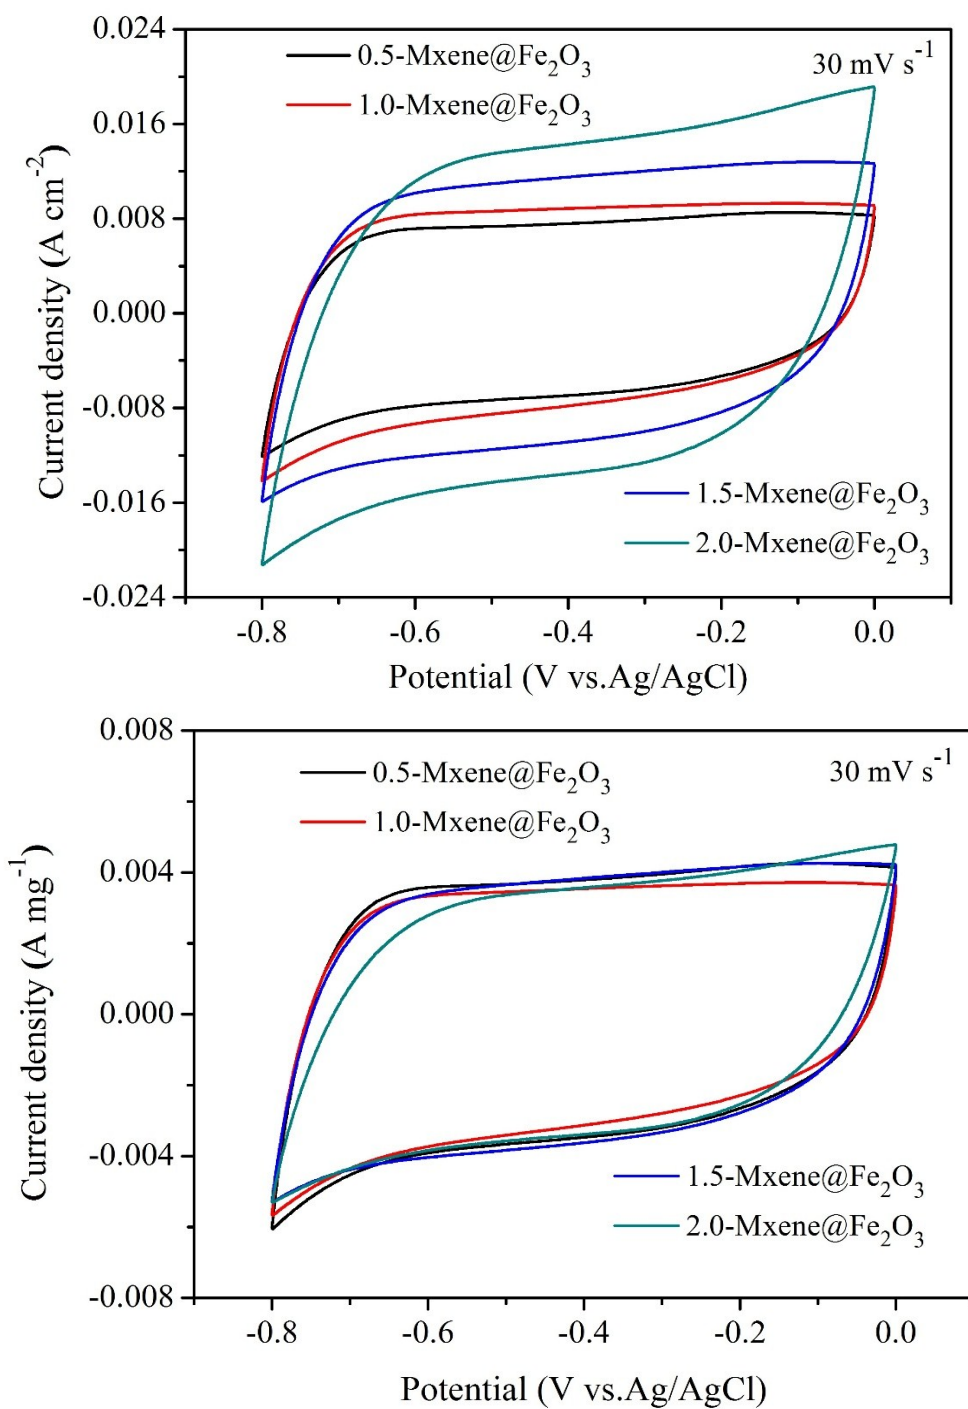

**Fig. S11** CV curves of Mxene@Fe<sub>2</sub>O<sub>3</sub>/CC with different loading masses of Mxene at 30 mV/s. Normalized by (a) electrode area (cm<sup>2</sup>) and (b) mass of the active material of electrode (mg).

**Table S2.** Comparison of Fe<sub>2</sub>O<sub>3</sub> anodes for supercapacitors.

| Electrode                                                | Electrolyte                         | Capacitance               | Current density          | Reference |
|----------------------------------------------------------|-------------------------------------|---------------------------|--------------------------|-----------|
| N-C/Fe <sub>2</sub> O <sub>3</sub>                       | 5 M LiCl                            | 148.5 mF cm <sup>-2</sup> | 0.5 mA cm <sup>-2</sup>  | [1]       |
| Fe <sub>2</sub> O <sub>3</sub> @C NRAs                   | 1 M KOH                             | 194 mF cm <sup>-2</sup>   | 2 mA cm <sup>-2</sup>    | [2]       |
| T-Fe <sub>2</sub> O <sub>3</sub> /Ppy                    | 1 M Na <sub>2</sub> SO <sub>4</sub> | 382.4 mF cm <sup>-2</sup> | 0.5 mA cm <sup>-2</sup>  | [3]       |
| crystalline/amorphous Fe <sub>2</sub> O <sub>3-δ</sub>   | 1 M LiOH                            | 350 mF cm <sup>-2</sup>   | 1 mA cm <sup>-2</sup>    | [4]       |
| Oxygen-deficient Fe <sub>2</sub> O <sub>3</sub> nanorods | 5 M LiCl                            | 382.7 mF cm <sup>-2</sup> | 0.5 mA cm <sup>-2</sup>  | [5]       |
| Fe <sub>2</sub> O <sub>3</sub> NTs                       | 5 M LiCl                            | 180.4 mF cm <sup>-2</sup> | 1 mA cm <sup>-2</sup>    | [6]       |
| Fe <sub>2</sub> O <sub>3</sub> -P nanorods               | 1 M Na <sub>2</sub> SO <sub>4</sub> | 340 mF cm <sup>-2</sup>   | 1 mA cm <sup>-2</sup>    | [7]       |
| α-Fe <sub>2</sub> O <sub>3</sub> /C nanoarrays           | 1 M Na <sub>2</sub> SO <sub>4</sub> | 430.8 mF cm <sup>-2</sup> | 1 mA cm <sup>-2</sup>    | [8]       |
| α-Fe <sub>2</sub> O <sub>3</sub> @PANI                   | 1 M Na <sub>2</sub> SO <sub>4</sub> | 103 mF cm <sup>-2</sup>   | 0.86 mA cm <sup>-2</sup> | [9]       |
| a-Fe <sub>2</sub> O <sub>3</sub> @NiO                    | 1 M LiOH                            | 557 mF cm <sup>-2</sup>   | 1 mA cm <sup>-2</sup>    | [10]      |
| Ni/GF/H-Fe <sub>2</sub> O <sub>3</sub>                   | 3 M KOH                             | 694 mF cm <sup>-2</sup>   | 1 mA cm <sup>-2</sup>    | [11]      |
| Mxene@Fe <sub>2</sub> O <sub>3</sub> /CC                 | 5 M LiCl                            | 725 mF cm <sup>-2</sup>   | 1 mA cm <sup>-2</sup>    | This work |



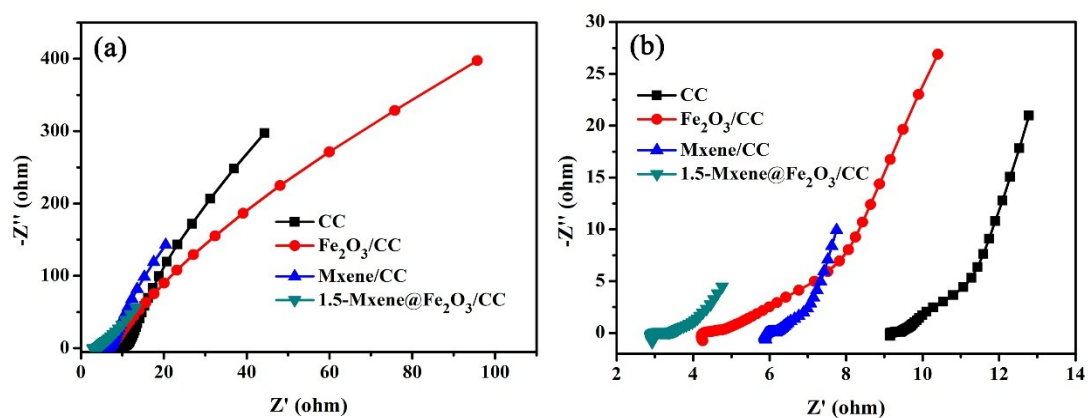

**Fig. S12** Nyquist plots of CC, Fe<sub>2</sub>O<sub>3</sub>/CC, Mxene /CC, 1.5-Mxene@Fe<sub>2</sub>O<sub>3</sub>/CC electrodes (a) and the enlarged at high frequency (b). The Mxene and CC possess excellent conductivity and there are less interfacial charge transfers between these, so the ESR of MXene/CC is much larger than that of Fe<sub>2</sub>O<sub>3</sub>/CC electrode at high-frequency range.

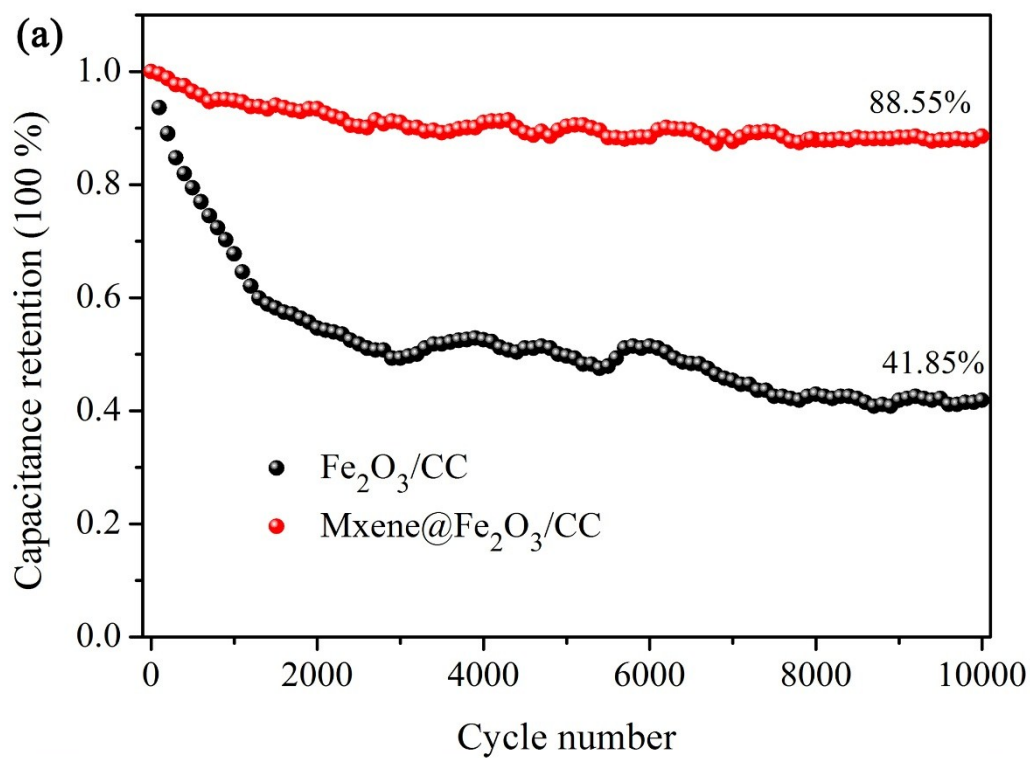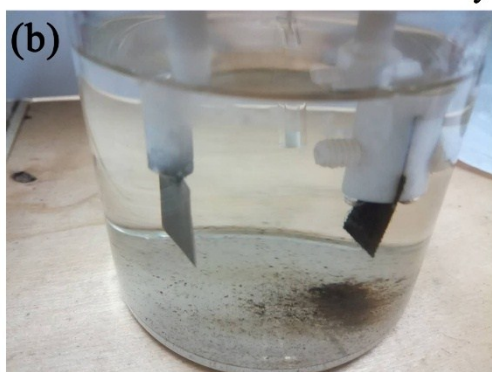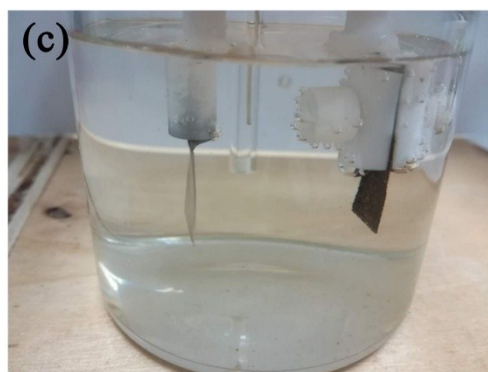

Fe<sub>2</sub>O<sub>3</sub>/CC After 10000 cycles    Mxene@Fe<sub>2</sub>O<sub>3</sub>/CC After 10000 cycles

**Fig. S13** (a) Cycling performances of the Fe<sub>2</sub>O<sub>3</sub>/CC, Mxene@Fe<sub>2</sub>O<sub>3</sub>/CC electrodes for 10000 cycles and the digital photographs of (b) Fe<sub>2</sub>O<sub>3</sub>/CC, (c) Mxene@Fe<sub>2</sub>O<sub>3</sub>/CC after 10000 cycles.

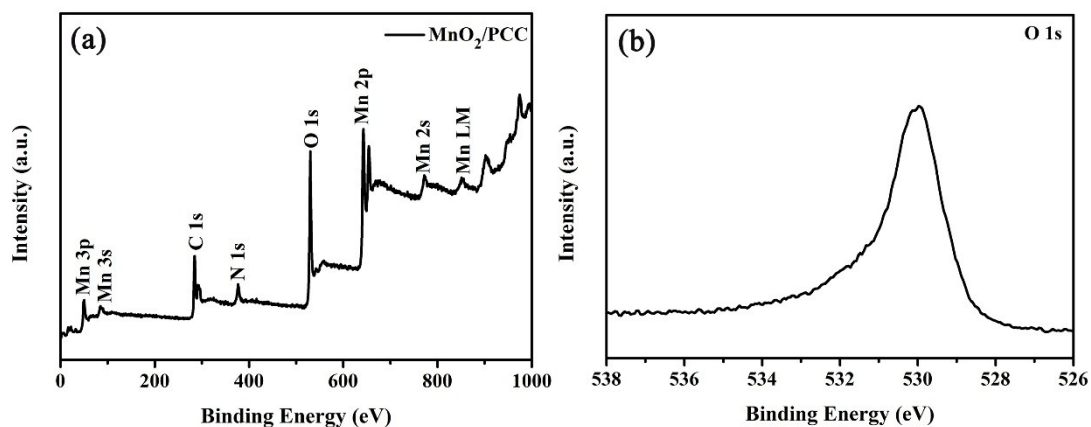

**Fig. S14** (a) XPS survey spectrum of the MnO<sub>2</sub>/PCC. (b) High-resolution XPS spectrum of O 1s.

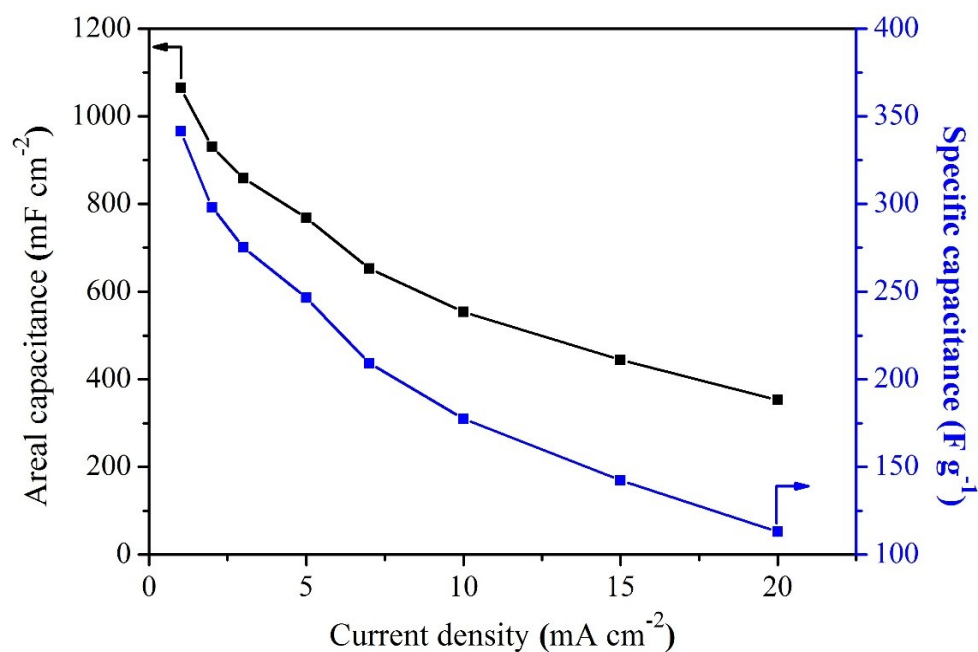

**Fig. S15** Areal (mF cm<sup>-2</sup>) and specific (F g<sup>-1</sup>) capacitance of MnO<sub>2</sub>/PCC electrode at different current densities.

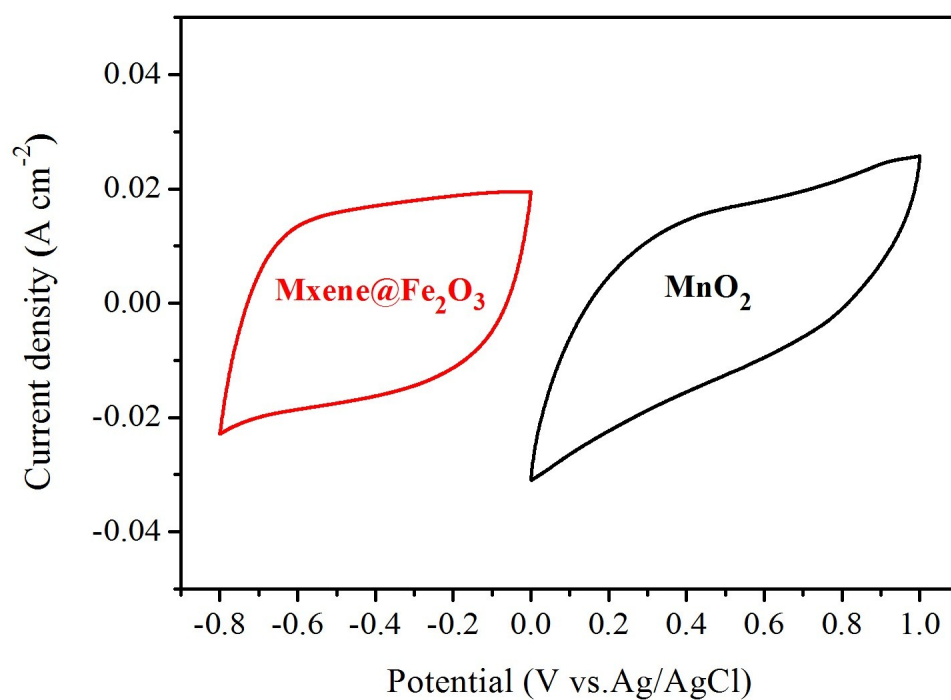

**Fig. S16** CV curves collected for MnO<sub>2</sub>/PCC and Mxene@Fe<sub>2</sub>O<sub>3</sub>/CC electrodes at a scan rate of 50 mV s<sup>-1</sup>

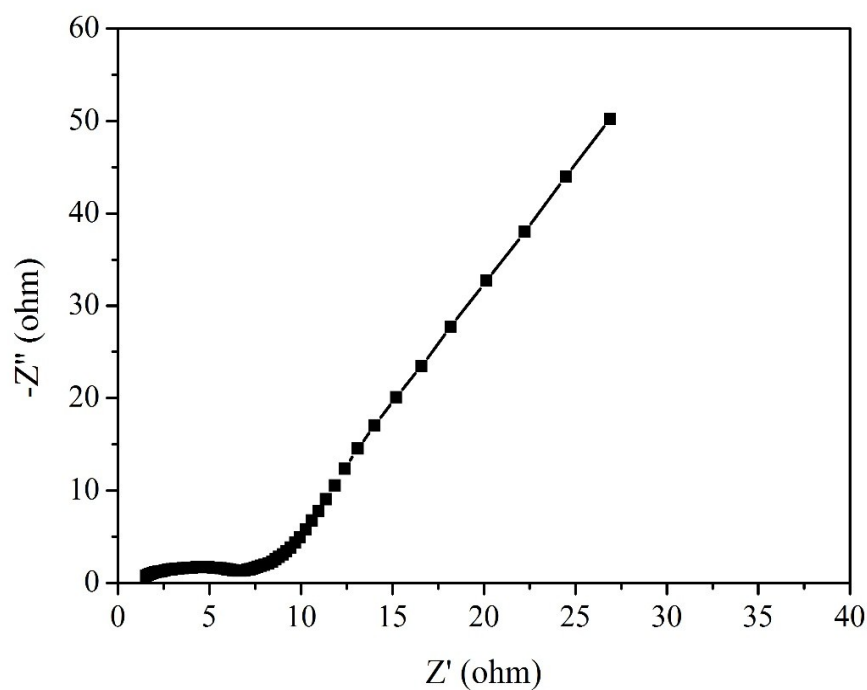

**Fig. S17** EIS of the as-assembled MnO<sub>2</sub>/PCC// Mxene@Fe<sub>2</sub>O<sub>3</sub>/CC ASCs

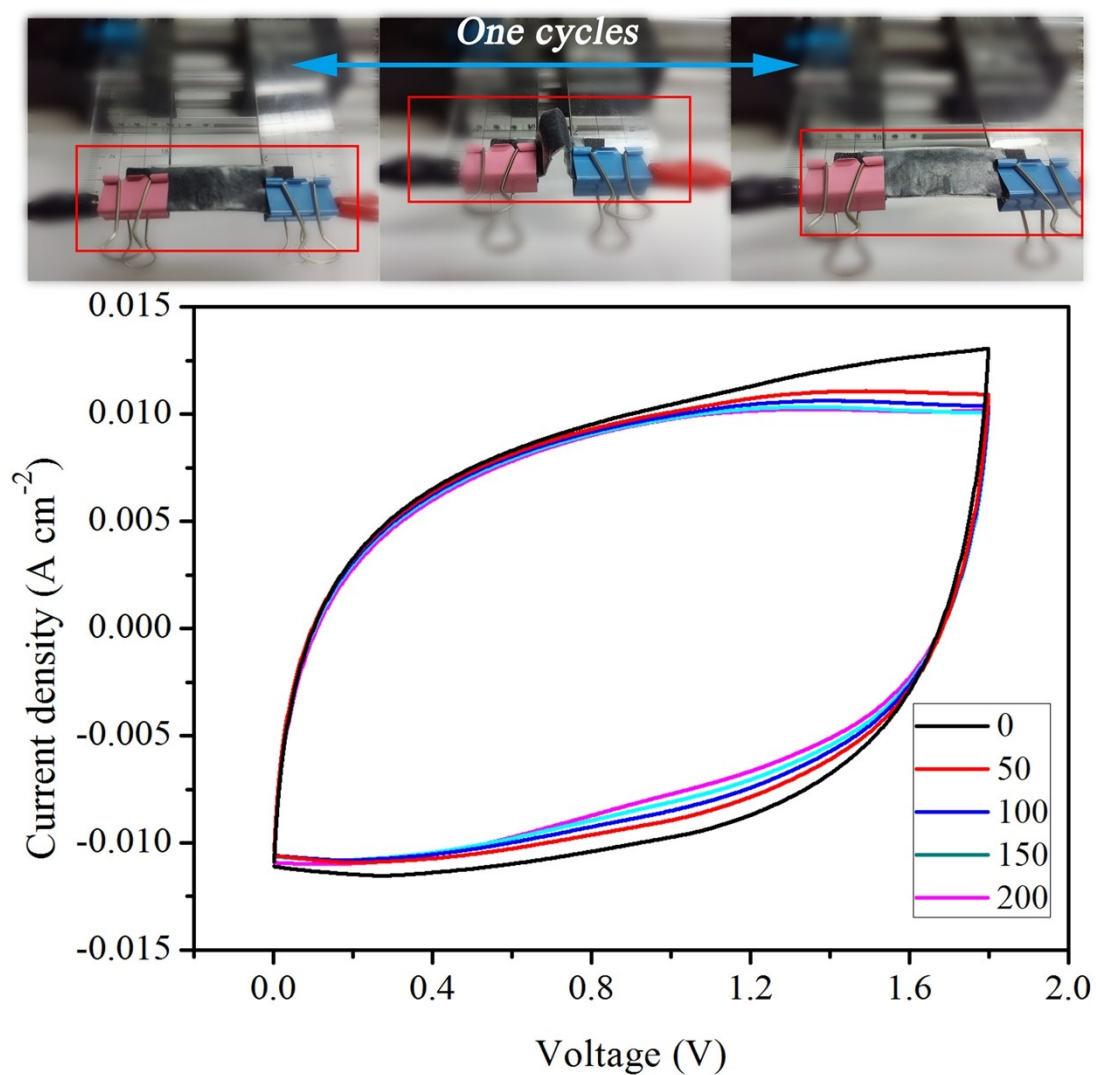

**Fig. S18** CV curves of the  $\text{MnO}_2/\text{PCC}/\text{Mxene}@\text{Fe}_2\text{O}_3/\text{CC-ASC}$  device collected at a scan rate of  $100 \text{ mV s}^{-1}$ , the device were bended and then released after 50, 100, 150, and 200 times, in which there were digital photographs during one cycle.



## Reference:

- [1] Fu W, Zhao E, Ren X, et al. Hierarchical fabric decorated with carbon nanowire/metal oxide nanocomposites for 1.6 V wearable aqueous supercapacitors[J]. *Advanced Energy Materials*, 2018, 8(18): 1703454.
- [2] Yang Q, Li Z, Zhang R, et al. Carbon modified transition metal oxides/hydroxides nanoarrays toward high-performance flexible all-solid-state supercapacitors[J]. *Nano Energy*, 2017, 41: 408-416.
- [3] Wang L, Yang H, Liu X, et al. Constructing Hierarchical Tectorum-like  $\alpha$ -Fe<sub>2</sub>O<sub>3</sub>/PPy Nanoarrays on Carbon Cloth for Solid-State Asymmetric Supercapacitors[J]. *Angewandte Chemie International Edition*, 2017, 56(4): 1105-1110.
- [4] Sun S, Zhai T, Liang C, et al. Boosted crystalline/amorphous Fe<sub>2</sub>O<sub>3- $\delta$</sub>  core/shell heterostructure for flexible solid-state pseudocapacitors in large scale[J]. *Nano Energy*, 2018, 45: 390-397.
- [5] Lu X, Zeng Y, Yu M, et al. Oxygen-deficient hematite nanorods as high-performance and novel negative electrodes for flexible asymmetric supercapacitors[J]. *Advanced materials*, 2014, 26(19): 3148-3155.
- [6] Yang P, Ding Y, Lin Z, et al. Low-cost high-performance solid-state asymmetric supercapacitors based on MnO<sub>2</sub> nanowires and Fe<sub>2</sub>O<sub>3</sub> nanotubes[J]. *Nano letters*, 2014, 14(2): 731-736.
- [7] Liang H, Xia C, Emwas A H, et al. Phosphine plasma activation of  $\alpha$ -Fe<sub>2</sub>O<sub>3</sub> for high energy asymmetric supercapacitors[J]. *Nano energy*, 2018, 49: 155-162.
- [8] Chen D, Zhou S, Quan H, et al. Tetra-subo-like  $\alpha$ -Fe<sub>2</sub>O<sub>3</sub>/C nanoarrays on carbon cloth as negative electrode for high-performance asymmetric supercapacitors[J]. *Chemical Engineering Journal*, 2018, 341: 102-111.
- [9] Lu X F, Chen X Y, Zhou W, et al.  $\alpha$ -Fe<sub>2</sub>O<sub>3</sub>@PANI core-shell nanowire arrays as negative electrodes for asymmetric supercapacitors[J]. *ACS applied materials & interfaces*, 2015, 7(27): 14843-14850.

- [10] Jiao Y, Liu Y, Yin B, et al. Hybrid  $\alpha$ -Fe<sub>2</sub>O<sub>3</sub>@NiO heterostructures for flexible and high performance supercapacitor electrodes and visible light driven photocatalysts[J]. Nano Energy, 2014, 10: 90-98.
- [11] Chi K, Zhang Z, Lv Q, et al. Well-ordered oxygen-deficient CoMoO<sub>4</sub> and Fe<sub>2</sub>O<sub>3</sub> nanoplate arrays on 3D graphene foam: toward flexible asymmetric supercapacitors with enhanced capacitive properties[J]. ACS applied materials & interfaces, 2017, 9(7): 6044-6053.
